# Supplementary material for: Design of peptide-based bolaamphiphiles exhibiting heat-set hydrogelation via retro-Diels–Alder reaction
Source: Royal Society of Chemistry journal article supplement (doi:10.1039/c3tb21680b), 2014-01-01
Supplement: c3tb21680b.pdf [file c3tb21680b.pdf]

## ***Supplementary Information***

# **Design of peptide-based bolaamphiphile exhibiting heat-set hydrogelation *via* retro-Diels-Alder reaction**

Rika Ochi,<sup>a</sup> Takashi Nishida,<sup>a</sup> Masato Ikeda,<sup>\*b, c</sup> and Itaru Hamachi<sup>\*a, d</sup>

<sup>a</sup> *Department of Synthetic Chemistry and Biological Chemistry,  
Graduate School of Engineering, Kyoto University, Katsura, Kyoto, 615-8510, Japan.*

*E-mail: ihamachi@sbchem.kyoto-u.ac.jp*

*Fax: +81-75-383-2759, Tel: +81-75-383-2754*

<sup>b</sup> *Department of Biomolecular Science,  
Graduate School of Engineering, Gifu University, Gifu, 501-1193, Japan.*

*E-mail: m\_ikeda@gifu-u.ac.jp*

<sup>c</sup> *United Graduate School of Drug Discovery and Medical Information Sciences,  
Gifu University, Gifu, 501-1193, Japan.*

<sup>d</sup> *Core Research for Evolutional Science and Technology (CREST),  
Japan Science and Technology Agency (JST), 5 Sanbancho, Chiyoda-ku, Tokyo,  
102-0075, Japan.*

### **Contents:**

1. Analytical HPLC of **1•2-endo**
2. Photograph and TEM image of FurTpa-BPh-F (**1**) hydrogel
3. Photographs of aqueous solutions of **1•2-endo** incubated at room temperature
4. HPLC analysis of dissociation of **1•2-endo** at 60 °C and RT
5. Aggregation property of **1•2-endo** in aqueous media

### 1. Analytical HPLC of **1•2-endo**

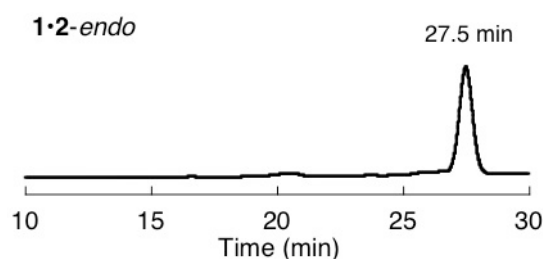

**Fig. S1.** HPLC chart of **1•2-endo** (RP-HPLC (column: YMC-Triart C18 column (250 mm × 4.6 mm I.D.), eluent: acetonitrile/water (containing 0.1 % TFA) = 25:75 to 80:20 over 40 min (linear gradient), flow rate = 1.0 mL/min, detection wavelength = 220 nm)).

### 2. Photograph and TEM image of FurTpa-BPh-F (**1**) hydrogel

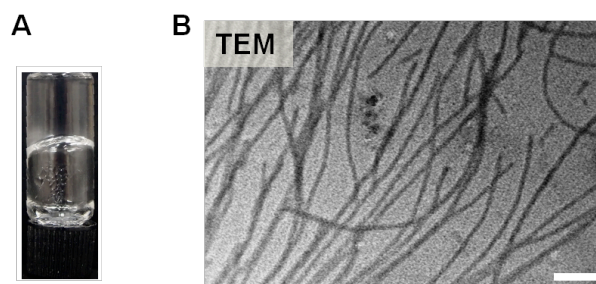

**Fig. S2.** (A) Photograph and (B) typical TEM image of FurTpa-BPh-F (**1**) hydrogel. Conditions: [FurTpa-BPh-F (**1**)] = 0.06 wt% (1.0 mM), 200 mM HEPES (pH 7.2). Scale bar is 200 nm.

### 3. Photographs of aqueous solutions of **1•2-endo** incubated at room temperature

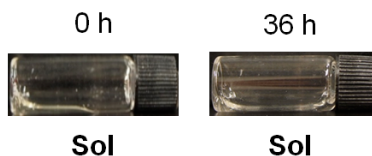

**Fig. S3.** Photographs of aqueous solutions of **1•2-endo** (18 mM, 200 mM HEPES (pH 7.2), 100  $\mu$ L) before and after incubation at room temperature.

#### 4. HPLC analysis of dissociation of **1•2-endo** at 60 °C and RT

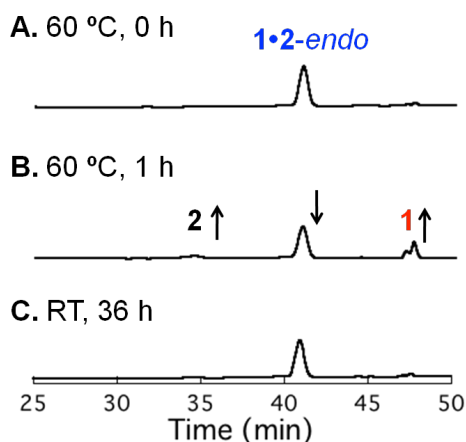

**Fig. S4.** HPLC traces of aqueous solutions of **1•2-endo** (18 mM, 200 mM HEPES (pH 7.2)) (A) before and (B) after heating at 60 °C, and (C) after incubation at room temperature for 36 h. HPLC conditions: acetonitrile/water (containing 0.1 % TFA) = 0:100 to 80:20 over 50 min (linear gradient), flow rate = 1.0 mL/min, detection wavelength = 220 nm).

#### 5. Aggregation property of **1•2-endo** in aqueous media

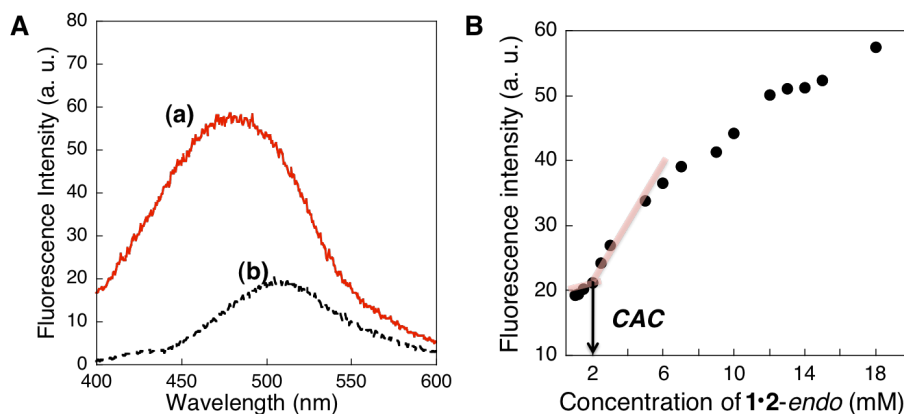

**Fig. S5.** (A) Fluorescence spectra ( $\lambda_{\text{ex}} = 375$  nm) of 1-anilino-8-naphthalene sulfonate (ANS, 20  $\mu\text{M}$ ) in (a) the presence or (b) the absence of **1•2-endo** (18 mM). (B) Fluorescence intensity of ANS at 475 nm depending on the **1•2-endo** concentrations, which yielded ca. 2 mM as critical association concentration (CAC) at 25 °C. Conditions: [**1•2-endo**] = 0–18 mM, 200 mM HEPES (pH 7.2).
